# Supplementary material
Source: HighWire-hosted journal article supplement (https://heart.bmj.com/content/105/12/920)
Supplement: inline-supplementary-material-1 [file inline-supplementary-material-1.docx]

Supplementary table 1

| Sports Category | Male Athletes (n=2393) | Female Athletes (n=1388) |
| --- | --- | --- |
| Static Sport | (n=200)  Bobsleigh  Cricket  Diving  Gymnastics  Judo  Javelin  Karate  Sailing  Shot put  Shooting  Taekwondo  Weight lifting | (n=459)  Diving  Gymnastics  Javelin  Judo  Karate  Sailing  Shot put  Taekwondo  Weight lifting |
| Endurance sport | (n=584)  Athletics (track event: 800 m, 1500 m, 3000 m and 10,000 m)  Boxing  Canoeing  Cycling  Long distance running  Rowing  Skating  Swimming  Triathlon | (n=337)  Athletics (track event: 800 m, 1500 m, 3000 m and 10,000 m)  Boxing  Canoeing  Cycling  Long distance running  Rowing  Skating  Swimming  Triathlon |
| Mixed Sport | (n= 1609)  Athletics (track (100 m, 200 m, 400 m)  Badminton  Basketball  Biathlon  Dance  Fencing  Football  Handball  Hockey  Netball  Pentathlon  Rugby  Squash  Table tennis  Tennis  Volleyball  Water Polo | (n=592)  Athletics (track (100 m, 200 m, 400 m)  Badminton  Basketball  Biathlon  Dance  Fencing  Football  Handball  Hockey  Netball  Pentathlon  Rugby  Squash  Table tennis  Tennis  Volleyball  Water Polo |
